# Supplementary material for: A chemically reduced graphene oxide–Au nanocage composite for the electrochemical detection of dopamine and uric acid
Source: Royal Society of Chemistry journal article supplement (doi:10.1039/c7ay00677b), 2017-01-01
Supplement: c7ay00677b1.pdf [file c7ay00677b1.pdf]

## Supporting Information

### **Chemical Reduced Graphene Oxide-Au Nanocages Composite for Electrochemical Detection of Dopamine and Uric Acid**

Weihao Li, <sup>†a</sup> Lian Ma, <sup>†a</sup> Bingxue Wu, <sup>a</sup> Yue Zhang, <sup>a\*</sup> and Zhuang Li <sup>b</sup>

<sup>a</sup> *Tianjin Key Laboratory of Organic Solar Cells and Photochemical Conversion, School of Chemistry  
& Chemical Engineering, Tianjin University of Technology, Tianjin 300384, PR China*

<sup>b</sup> *State Key Laboratory of Electroanalytical Chemistry, Changchun Institute of Applied Chemistry,  
Chinese Academy of Sciences, Changchun, Jilin 130022, PR China*

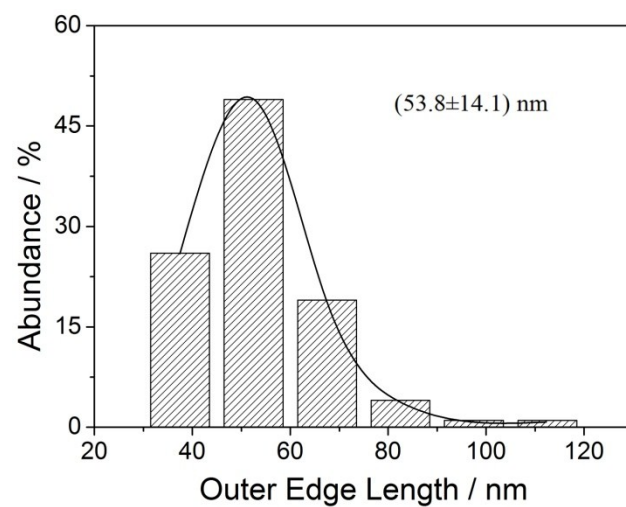

**Fig. S1** The size analysis of the AuNCs. (N=100)

**Table S1.** Urine sample analysis by CRGO-AuNCs/GCE (diluted by 0.1M PBS (pH=7.4) with 1:30 dilution).

| Sample | DA<br>level<br>( $\mu\text{M}$ ) | UA<br>level<br>( $\mu\text{M}$ ) | Found<br>of DA<br>( $\mu\text{M}$ ) | Found<br>of UA<br>( $\mu\text{M}$ ) | Recovery<br>of DA (%) | Recovery<br>of UA (%) | RSD of<br>DA<br>(n=3) | RSD of<br>UA<br>(n=3) |
|--------|----------------------------------|----------------------------------|-------------------------------------|-------------------------------------|-----------------------|-----------------------|-----------------------|-----------------------|
| 1      | 100<br>(spiked)                  | 100                              | 97                                  |                                     | 97                    |                       | 26                    |                       |
| 2      | 50                               | 100<br>(spiked)                  |                                     | 105                                 |                       | 105                   |                       | 11                    |
